# Supplementary material for: Heavy Mn2+-doped near-infrared photon upconversion luminescence in fluoride RbZnF3:Yb3+,Mn2+ guided by dopant distribution simulation
Source: Royal Society of Chemistry journal article supplement (doi:10.1039/d0tc03225e), 2020-01-01
Supplement: d0tc03225e1.pdf [file d0tc03225e1.pdf]

## Supporting Information

### **Heavy Mn<sup>2+</sup> doped Near-Infrared Photon Upconversion Luminescence in Fluoride RbZnF<sub>3</sub>:Yb<sup>3+</sup>, Mn<sup>2+</sup> Guided by Dopant Distribution Simulation**

Xinxin Han,<sup>a</sup> Enhai Song,<sup>\*a</sup> Shuai Zhang,<sup>a</sup> Shi Ye,<sup>a</sup> Xiaobao Yang<sup>b</sup> and Qinyuan Zhang<sup>\*a</sup>

*<sup>a</sup>State Key Laboratory of Luminescent Materials and Devices, Guangdong Provincial Key Laboratory of Fiber Laser Materials and Applied Techniques, School of Materials Science and Engineering, South China University of Technology, Guangzhou 510641, China*

*<sup>b</sup>Department of Physics, South China University of Technology, Guangzhou 510641, China*

\*Corresponding author E-mail: [msehsong@scut.edu.cn](mailto:msehsong@scut.edu.cn)(Enhai Song); [qyzhang@scut.edu.cn](mailto:qyzhang@scut.edu.cn)(Qinyuan Zhang).

**Table S1** Number of Mn<sup>2+</sup>-Mn<sup>2+</sup> dimer, average Mn<sup>2+</sup>-Mn<sup>2+</sup> distance, total energy (*E*) and formation enthalpy ( $\Delta H$ ) of three different substitution geometry models for a 3×3×3 supercell of RbZnF<sub>3</sub> with two Zn<sup>2+</sup> replaced by two Mn<sup>2+</sup> (coverage  $x'=2/27$ )

| Models for $x=2/27$ | Number of Mn <sup>2+</sup> -Mn <sup>2+</sup> dimer | Average Mn <sup>2+</sup> -Mn <sup>2+</sup> distance (Å) | <i>E</i> (eV)    | $\Delta H$ (eV) |
|---------------------|----------------------------------------------------|---------------------------------------------------------|------------------|-----------------|
| <b>M1</b>           | <b>1</b>                                           | <b>4.1887</b>                                           | <b>-564.8166</b> | <b>0.0384</b>   |
| M2                  | 0                                                  | 5.9238                                                  | -564.7370        | 0.1180          |
| M3                  | 0                                                  | 7.2551                                                  | -564.7356        | 0.1194          |

**Table S2** Number of Mn<sup>2+</sup>-Mn<sup>2+</sup> dimer, average Mn<sup>2+</sup>-Mn<sup>2+</sup> distance, total energy (*E*) and formation enthalpy ( $\Delta H$ ) of ten different substitution geometry models for a 3×3×3 supercell of RbZnF<sub>3</sub> with three Zn<sup>2+</sup> replaced by three Mn<sup>2+</sup> (coverage  $x'=3/27$ )

| Models for $x=3/27$ | Number of Mn <sup>2+</sup> -Mn <sup>2+</sup> dimer | Average Mn <sup>2+</sup> -Mn <sup>2+</sup> distance (Å) | <i>E</i> (eV)    | $\Delta H$ (eV) |
|---------------------|----------------------------------------------------|---------------------------------------------------------|------------------|-----------------|
| M1                  | 2                                                  | 5.584993                                                | -569.7340        | 0.1250          |
| <b>M2</b>           | <b>2</b>                                           | <b>4.767087</b>                                         | <b>-569.8025</b> | <b>0.0565</b>   |
| M3                  | 1                                                  | 5.345433                                                | -569.7240        | 0.1350          |
| M4                  | 1                                                  | 5.789213                                                | -569.7304        | 0.1286          |
| M5                  | 1                                                  | 6.232993                                                | -569.7264        | 0.1326          |
| M6                  | 0                                                  | 5.92378                                                 | -569.6415        | 0.2175          |
| M7                  | 0                                                  | 5.92378                                                 | -569.6405        | 0.2185          |
| M8                  | 0                                                  | 7.25512                                                 | -569.6398        | 0.2192          |
| M9                  | 0                                                  | 6.81134                                                 | -569.6390        | 0.2200          |
| M10                 | 0                                                  | 7.25512                                                 | -569.6373        | 0.2217          |

**Table S3** Number of Mn<sup>2+</sup>-Mn<sup>2+</sup> dimer, average Mn<sup>2+</sup>-Mn<sup>2+</sup> distance, total energy (*E*) and formation enthalpy ( $\Delta H$ ) of thirty-four different substitution geometry models for a 3×3×3 supercell of RbZnF<sub>3</sub> with four Zn<sup>2+</sup> replaced by four Mn<sup>2+</sup> (coverage  $x'=4/27$ )

| Models for $x=4/27$ | Number of Mn <sup>2+</sup> -Mn <sup>2+</sup> dimer | Average Mn <sup>2+</sup> -Mn <sup>2+</sup> distance (Å) | <i>E</i> (eV)    | $\Delta H$ (eV) |
|---------------------|----------------------------------------------------|---------------------------------------------------------|------------------|-----------------|
| M1                  | 4                                                  | 4.767087                                                | -574.7123        | 0.14972         |
| M2                  | 3                                                  | 5.50004                                                 | -574.6430        | 0.21904         |
| <b>M3</b>           | <b>4</b>                                           | <b>4.767087</b>                                         | <b>-574.8499</b> | <b>0.01208</b>  |
| M4                  | 3                                                  | 5.05626                                                 | -574.7701        | 0.09192         |
| M5                  | 2                                                  | 5.345433                                                | -574.6886        | 0.17339         |
| M6                  | 3                                                  | 5.05626                                                 | -574.7569        | 0.10509         |
| M7                  | 3                                                  | 5.27815                                                 | -574.7744        | 0.08761         |
| M8                  | 2                                                  | 5.567323                                                | -574.6917        | 0.17031         |
| M9                  | 2                                                  | 5.567323                                                | -574.6989        | 0.16313         |
| M10                 | 2                                                  | 5.789213                                                | -574.6955        | 0.16652         |
| M11                 | 2                                                  | 6.011103                                                | -574.6931        | 0.1689          |
| M12                 | 2                                                  | 5.345433                                                | -574.6846        | 0.17739         |
| M13                 | 1                                                  | 5.634607                                                | -574.6119        | 0.25014         |
| M14                 | 1                                                  | 5.856497                                                | -574.6161        | 0.24592         |
| M15                 | 2                                                  | 5.789213                                                | -574.7073        | 0.15474         |
| M16                 | 1                                                  | 6.078387                                                | -574.6156        | 0.24642         |
| M17                 | 1                                                  | 6.078387                                                | -574.6138        | 0.24818         |
| M18                 | 2                                                  | 6.011103                                                | -574.7137        | 0.14834         |
| M19                 | 2                                                  | 6.011103                                                | -574.7106        | 0.15138         |
| M20                 | 1                                                  | 6.078387                                                | -574.6237        | 0.23834         |
| M21                 | 1                                                  | 6.300277                                                | -574.6189        | 0.24311         |
| M22                 | 1                                                  | 6.078387                                                | -574.6218        | 0.24025         |
| M23                 | 1                                                  | 6.300277                                                | -574.6204        | 0.24159         |
| M24                 | 1                                                  | 6.522167                                                | -574.6167        | 0.24529         |
| M25                 | 2                                                  | 6.232993                                                | -574.7014        | 0.16064         |
| M26                 | 1                                                  | 6.522167                                                | -574.6143        | 0.24766         |
| M27                 | 0                                                  | 6.14567                                                 | -574.5299        | 0.33215         |
| M28                 | 0                                                  | 5.92378                                                 | -574.5300        | 0.33205         |
| M29                 | 0                                                  | 6.14567                                                 | -574.5289        | 0.33308         |
| M30                 | 0                                                  | 6.36756                                                 | -574.5284        | 0.33362         |
| M31                 | 0                                                  | 6.58945                                                 | -574.5273        | 0.33469         |
| M32                 | 0                                                  | 6.36756                                                 | -574.5275        | 0.33451         |
| M33                 | 0                                                  | 6.58945                                                 | -574.5269        | 0.33506         |
| M34                 | 0                                                  | 6.58945                                                 | -574.5267        | 0.33528         |

**Table S4** Number of Mn<sup>2+</sup>-Mn<sup>2+</sup> dimer, average Mn<sup>2+</sup>-Mn<sup>2+</sup> distance, total energy (*E*) and formation enthalpy ( $\Delta H$ ) of one hundred and five different substitution geometry models for a 3×3×3 supercell of RbZnF<sub>3</sub> with five Zn<sup>2+</sup> replaced by five Mn<sup>2+</sup> (coverage  $x'=5/27$ )

| Models for<br>$x=5/27$ | Number of<br>Mn <sup>2+</sup> -Mn <sup>2+</sup> dimer | Average Mn <sup>2+</sup> -Mn <sup>2+</sup><br>distance (Å) | <i>E</i> (eV)    | $\Delta H$ (eV) |
|------------------------|-------------------------------------------------------|------------------------------------------------------------|------------------|-----------------|
| M1                     | 4                                                     | 5.322528                                                   | -579.7559        | 0.10907         |
| M2                     | 6                                                     | 4.882756                                                   | -579.5917        | 0.27327         |
| M3                     | 5                                                     | 5.05626                                                    | -579.6740        | 0.19101         |
| M4                     | 4                                                     | 5.229764                                                   | -579.6647        | 0.20034         |
| M5                     | 5                                                     | 5.189394                                                   | -579.6773        | 0.18773         |
| M6                     | 5                                                     | 5.322528                                                   | -579.6861        | 0.17887         |
| M7                     | 4                                                     | 5.496032                                                   | -579.2931        | 0.57186         |
| M8                     | 4                                                     | 5.496032                                                   | -579.5999        | 0.26513         |
| M9                     | 4                                                     | 5.629166                                                   | -579.6048        | 0.26023         |
| M10                    | 4                                                     | 5.7623                                                     | -579.6339        | 0.23112         |
| M11                    | 4                                                     | 5.7623                                                     | -579.6166        | 0.24845         |
| M12                    | 3                                                     | 5.935804                                                   | -579.5355        | 0.32946         |
| M13                    | 3                                                     | 5.935804                                                   | -579.5363        | 0.32871         |
| M14                    | 3                                                     | 6.068938                                                   | -579.5340        | 0.33101         |
| M15                    | 4                                                     | 5.229764                                                   | -579.7216        | 0.14338         |
| <b>M16</b>             | <b>5</b>                                              | <b>5.189394</b>                                            | <b>-579.8008</b> | <b>0.06422</b>  |
| M17                    | 4                                                     | 5.496032                                                   | -579.7314        | 0.13357         |
| M18                    | 4                                                     | 5.7623                                                     | -579.7284        | 0.13659         |
| M19                    | 4                                                     | 5.229764                                                   | -579.7211        | 0.14391         |
| M20                    | 4                                                     | 5.362898                                                   | -579.7202        | 0.1448          |
| M21                    | 4                                                     | 5.496032                                                   | -579.7324        | 0.1326          |
| M22                    | 3                                                     | 5.536402                                                   | -579.6543        | 0.21073         |
| M23                    | 3                                                     | 5.669536                                                   | -579.6505        | 0.21453         |
| M24                    | 3                                                     | 5.80267                                                    | -579.6526        | 0.21239         |
| M25                    | 3                                                     | 5.536402                                                   | -579.6363        | 0.22872         |
| M26                    | 3                                                     | 5.669536                                                   | -579.6516        | 0.21343         |
| M27                    | 2                                                     | 5.709906                                                   | -579.5707        | 0.29427         |
| M28                    | 2                                                     | 5.84304                                                    | -579.5731        | 0.29186         |
| M29                    | 2                                                     | 5.84304                                                    | -579.5724        | 0.2926          |
| M30                    | 3                                                     | 5.80267                                                    | -579.6649        | 0.20007         |
| M31                    | 3                                                     | 5.536402                                                   | -579.6448        | 0.22021         |
| M32                    | 3                                                     | 5.669536                                                   | -579.6424        | 0.22261         |
| M33                    | 3                                                     | 5.80267                                                    | -579.6387        | 0.22627         |
| M34                    | 3                                                     | 5.935804                                                   | -579.6348        | 0.23022         |
| M35                    | 4                                                     | 5.496032                                                   | -579.7400        | 0.12501         |
| M36                    | 3                                                     | 5.80267                                                    | -579.6590        | 0.20604         |
| M37                    | 3                                                     | 5.669536                                                   | -579.6563        | 0.20874         |
| M38                    | 4                                                     | 5.629166                                                   | -579.7340        | 0.13098         |

---

|     |   |          |           |         |
|-----|---|----------|-----------|---------|
| M39 | 3 | 5.935804 | -579.6543 | 0.21074 |
| M40 | 3 | 5.80267  | -579.6512 | 0.21377 |
| M41 | 3 | 6.068938 | -579.6501 | 0.21493 |
| M42 | 2 | 5.84304  | -579.5784 | 0.28658 |
| M43 | 3 | 5.80267  | -579.6715 | 0.19349 |
| M44 | 2 | 5.84304  | -579.5736 | 0.29138 |
| M45 | 2 | 5.976174 | -579.5760 | 0.28902 |
| M46 | 3 | 5.935804 | -579.6673 | 0.19766 |
| M47 | 3 | 5.669536 | -579.6532 | 0.21176 |
| M48 | 2 | 5.976174 | -579.5774 | 0.28759 |
| M49 | 2 | 5.976174 | -579.5752 | 0.28976 |
| M50 | 2 | 5.976174 | -579.5705 | 0.29446 |
| M51 | 2 | 6.109308 | -579.5727 | 0.29228 |
| M52 | 2 | 6.109308 | -579.5718 | 0.2932  |
| M53 | 3 | 5.80267  | -579.6717 | 0.19332 |
| M54 | 2 | 6.109308 | -579.5766 | 0.28842 |
| M55 | 3 | 5.669536 | -579.6680 | 0.19701 |
| M56 | 2 | 5.976174 | -579.5816 | 0.28341 |
| M57 | 2 | 6.242442 | -579.5749 | 0.29009 |
| M58 | 2 | 6.109308 | -579.5760 | 0.28896 |
| M59 | 3 | 6.068938 | -579.6645 | 0.20054 |
| M60 | 3 | 5.935804 | -579.6616 | 0.20339 |
| M61 | 2 | 6.242442 | -579.2607 | 0.6043  |
| M62 | 2 | 6.242442 | -579.5722 | 0.29276 |
| M63 | 2 | 6.202072 | -579.5722 | 0.29276 |
| M64 | 2 | 5.576772 | -579.5697 | 0.29528 |
| M65 | 2 | 5.84304  | -579.5726 | 0.29242 |
| M66 | 1 | 5.88341  | -579.4988 | 0.3662  |
| M67 | 1 | 6.016544 | -579.4963 | 0.36873 |
| M68 | 2 | 5.84304  | -579.5856 | 0.27936 |
| M69 | 1 | 6.149678 | -579.4946 | 0.37039 |
| M70 | 1 | 6.016544 | -579.4957 | 0.36926 |
| M71 | 2 | 5.84304  | -579.5912 | 0.27385 |
| M72 | 2 | 5.976174 | -579.5879 | 0.27707 |
| M73 | 1 | 6.149678 | -579.4997 | 0.36531 |
| M74 | 1 | 6.149678 | -579.4985 | 0.36654 |
| M75 | 1 | 6.016544 | -579.5021 | 0.36293 |
| M76 | 1 | 6.149678 | -579.4986 | 0.36642 |
| M77 | 1 | 6.282812 | -579.4975 | 0.3675  |
| M78 | 1 | 6.149678 | -579.4958 | 0.36917 |
| M79 | 2 | 6.109308 | -579.5921 | 0.27293 |
| M80 | 2 | 6.242442 | -579.5868 | 0.27821 |
| M81 | 2 | 6.109308 | -579.5823 | 0.28267 |
| M82 | 2 | 6.109308 | -579.5910 | 0.27401 |

---

|      |   |          |           |         |
|------|---|----------|-----------|---------|
| M83  | 2 | 6.109308 | -579.5916 | 0.27345 |
| M84  | 1 | 6.282812 | -579.4959 | 0.36911 |
| M85  | 1 | 6.282812 | -579.4956 | 0.36944 |
| M86  | 2 | 6.109308 | -579.5768 | 0.2882  |
| M87  | 2 | 6.109308 | -579.5988 | 0.26625 |
| M88  | 2 | 6.375576 | -579.5895 | 0.27551 |
| M89  | 2 | 6.242442 | -579.5928 | 0.27218 |
| M90  | 2 | 6.242442 | -579.5913 | 0.27373 |
| M91  | 1 | 6.149678 | -579.5052 | 0.35982 |
| M92  | 1 | 6.415946 | -579.4992 | 0.36579 |
| M93  | 1 | 6.415946 | -579.4971 | 0.36787 |
| M94  | 1 | 6.282812 | -579.5023 | 0.36268 |
| M95  | 1 | 6.415946 | -579.4998 | 0.36517 |
| M96  | 2 | 6.375576 | -579.5815 | 0.28353 |
| M97  | 0 | 6.190048 | -579.4125 | 0.4525  |
| M98  | 0 | 6.190048 | -579.4131 | 0.45189 |
| M99  | 0 | 6.190048 | -579.4137 | 0.45133 |
| M100 | 0 | 6.323182 | -579.4128 | 0.45217 |
| M101 | 0 | 6.323182 | -579.4121 | 0.45286 |
| M102 | 0 | 6.456316 | -579.4087 | 0.45634 |
| M103 | 0 | 6.456316 | -579.4096 | 0.4554  |
| M104 | 0 | 6.456316 | -579.4092 | 0.45585 |
| M105 | 0 | 6.456316 | -579.4071 | 0.45791 |

**Table S5** Rietveld refinement data for RbZnF<sub>3</sub>

| Formula                   | RbZnF <sub>3</sub> |
|---------------------------|--------------------|
| space group               | $Pm\bar{3}m$       |
| a=b=c (Å)                 | 4.11248(6)         |
| $\alpha=\beta=\gamma$ (°) | 90                 |
| Z                         | 1                  |
| V (Å <sup>3</sup> )       | 69.5525(18)        |
| R <sub>wp</sub> (%)       | 7.02               |
| R <sub>p</sub> (%)        | 5.32               |
| $\chi^2$                  | 4.365              |

Note: The refinements are stable and give low R-factors.

**Table S6** The fitting parameters of the Mn K-edge EXAFS curves in RbMnF<sub>3</sub>

| Chemical bond | CN<br>(Coordination number) | R (Å) | $\sigma^2(\text{Å}^2)$<br>(Debye Waller Factor) | $\Delta E_0$ (eV)<br>(Edge-energy shift) |
|---------------|-----------------------------|-------|-------------------------------------------------|------------------------------------------|
| Mn-F          | 6.2                         | 2.160 | 0.0077                                          | -7.9                                     |
| Mn-Rb         | 8.2                         | 3.733 | 0.0162                                          | -7.9                                     |
| Mn-Mn         | 6.2                         | 4.418 | 0.0019                                          | -7.9                                     |

Error bounds of the structural parameters were estimated as CN $\pm$ 15%; R $\pm$ 1%;  $\sigma^2\pm$ 20%; $\Delta E_0\pm$ 20%. Mn K-edge fitting range: K-space range: 3.5-10.5; R-space range: 1.1-4.5 Å.

**Table S7** The fitting parameters of the Mn K-edge EXAFS curves in RbZnF<sub>3</sub>: 20%Mn<sup>2+</sup>

| Chemical bond | CN<br>(Coordination number) | R (Å) | $\sigma^2(\text{Å}^2)$<br>(Debye Waller Factor) | $\Delta E_0$ (eV)<br>(Edge-energy shift) |
|---------------|-----------------------------|-------|-------------------------------------------------|------------------------------------------|
| Mn-F          | 5.8                         | 2.152 | 0.0064                                          | -8.2                                     |
| Mn-Rb         | 7.8                         | 3.680 | 0.0153                                          | -8.2                                     |
| Mn-Mn/Zn      | 5.8                         | 4.370 | 0.0012                                          | -8.2                                     |

Error bounds of the structural parameters were estimated as CN $\pm$ 15%; R $\pm$ 1%;  $\sigma^2\pm$ 20%; $\Delta E_0\pm$ 20%. Mn K-edge fitting range: K-space range: 3.5-10.5; R-space range: 1.1-4.5 Å.

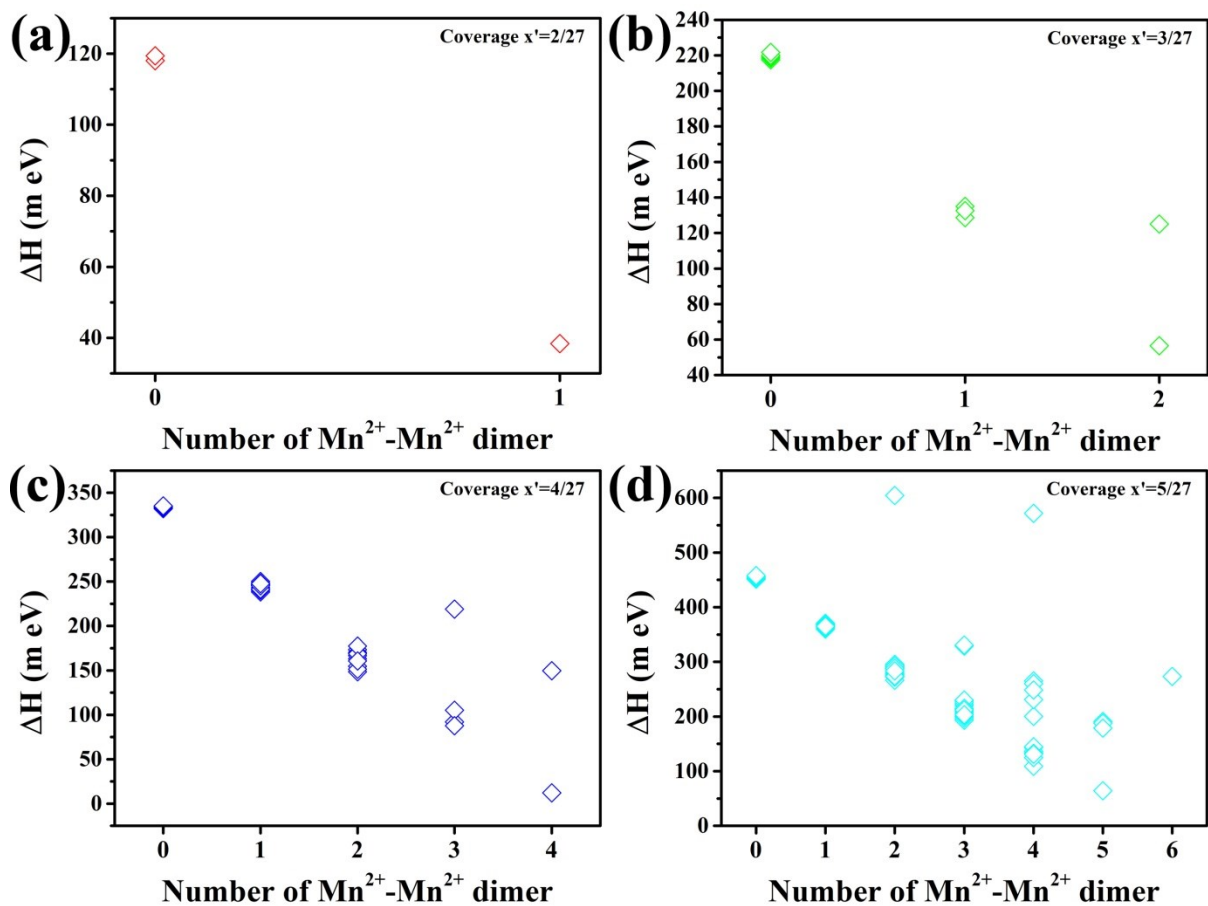

**Fig. S1** The dependence of formation enthalpy ( $\Delta H$ ) on the number of  $\text{Mn}^{2+}$ - $\text{Mn}^{2+}$  dimer for a certain  $\text{Mn}^{2+}$  coverage  $x'$  in a  $3 \times 3 \times 3$   $\text{RbZnF}_3$  supercell: (a)  $x'=2/27$ , (b)  $x'=3/27$ , (c)  $x'=4/27$ , (d)  $x'=5/27$ .



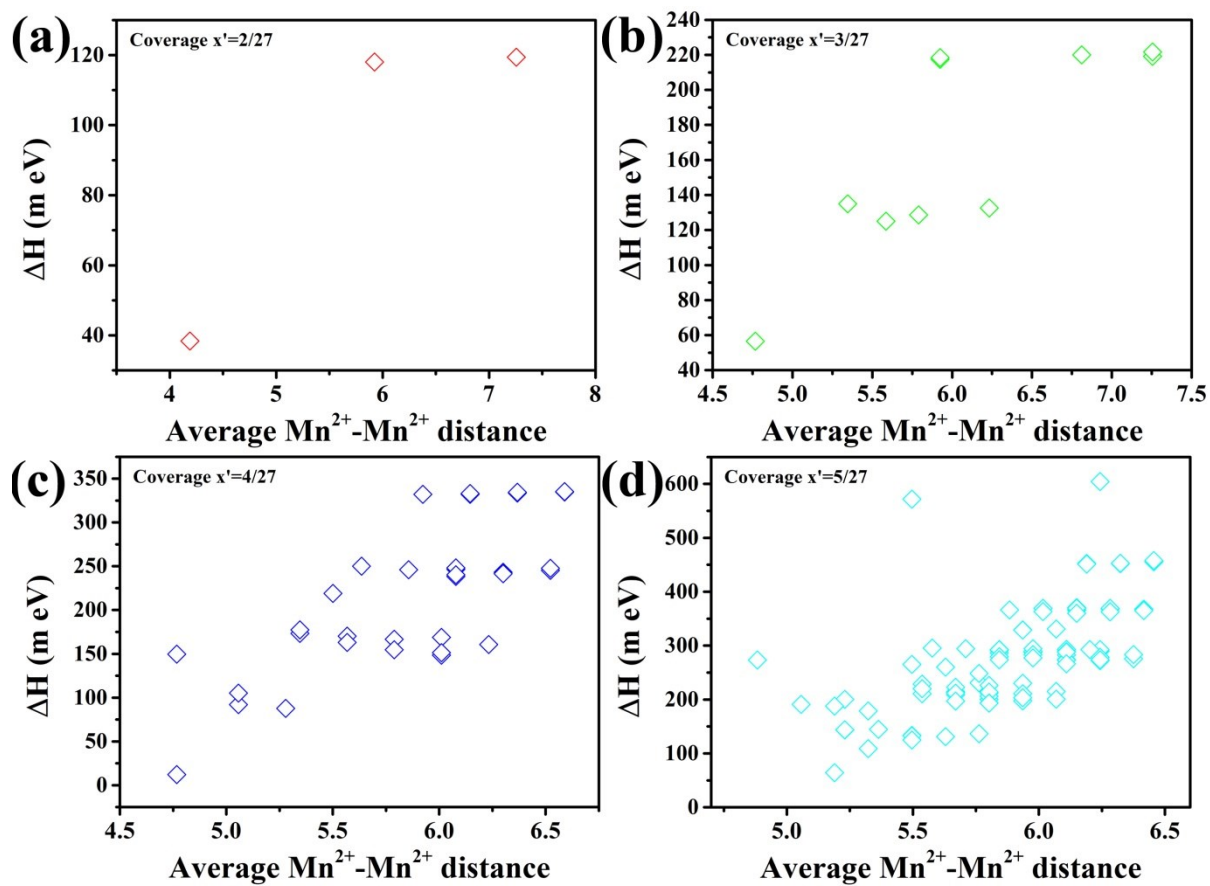

**Fig. S2** The dependence of formation enthalpy ( $\Delta H$ ) on the average  $\text{Mn}^{2+}$ - $\text{Mn}^{2+}$  distance for a certain  $\text{Mn}^{2+}$  coverage  $x'$  in a  $3 \times 3 \times 3$   $\text{RbZnF}_3$  supercell: (a)  $x'=2/27$ , (b)  $x'=3/27$ , (c)  $x'=4/27$ , (d)  $x'=5/27$ .

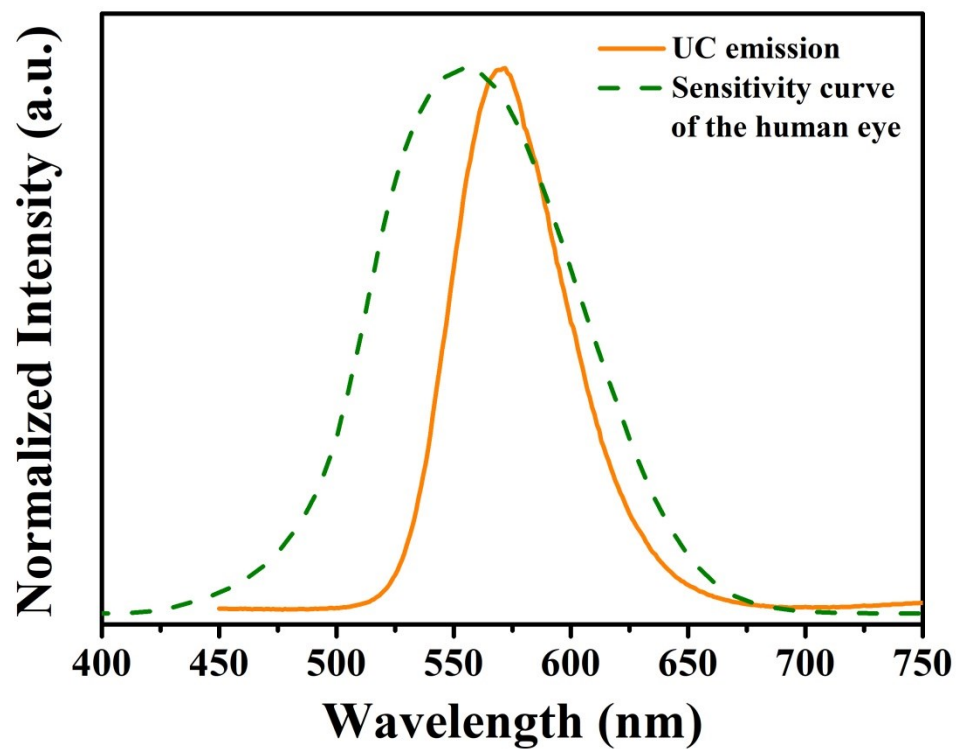

**Fig. S3** UC emission spectra of  $\text{RbZnF}_3:0.5\% \text{Yb}^{3+}, 5\% \text{Mn}^{2+}$  upon excitation with a 980 nm LD and the sensitivity curve of the human eye (dashed line).

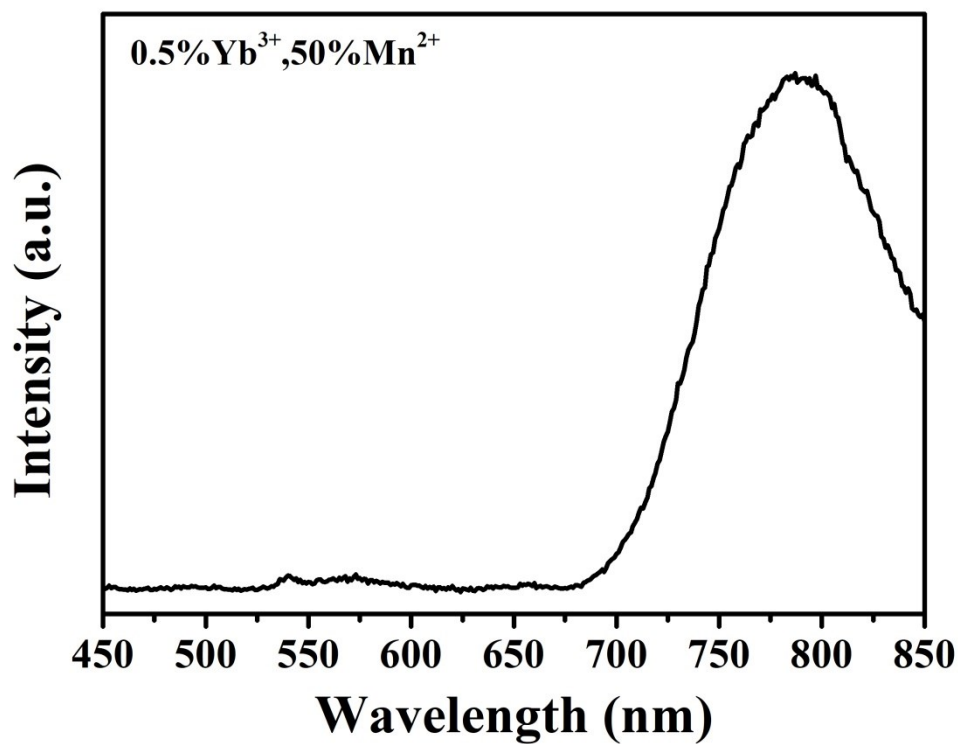

**Fig. S4** UC emission spectra of RbZnF<sub>3</sub>: 0.5%Yb<sup>3+</sup>, 50%Mn<sup>2+</sup> upon excitation of 980 nm laser.
